# Supplementary material for: Ni Nanoparticles on the Reduced Graphene Oxide Surface Synthesized in Supercritical Isopropanol
Source: MDPI journal article supplement (doi:10.3390/nano13222923), 2023-11-09
Supplement: s1 [file s1]

## Supplementary Information

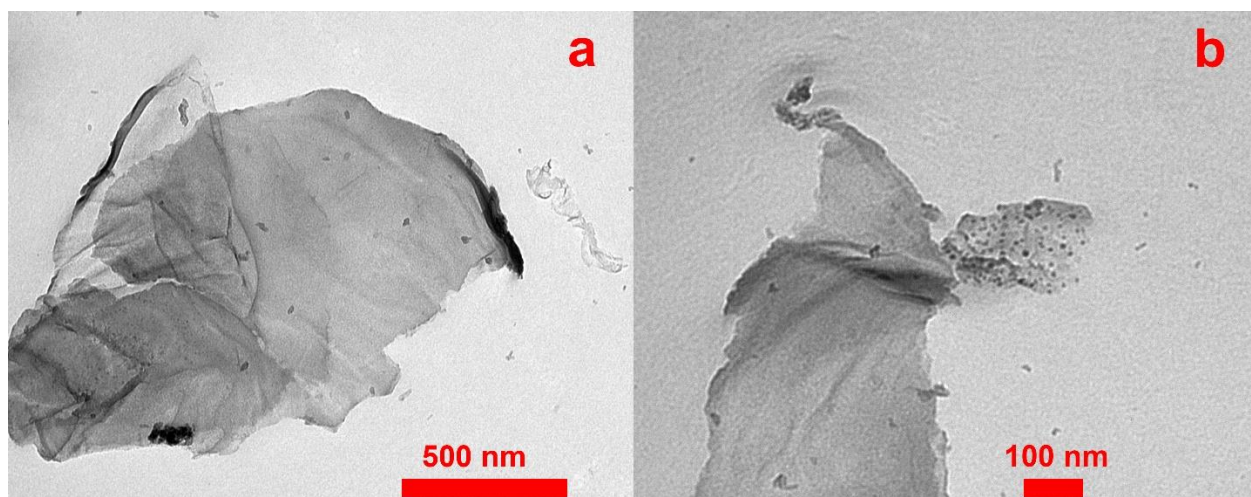

**Figure S1.** TEM of GO/  $\text{Ni}^{2+}$  after thermal reduction without SCI treatment
